# Supplementary material for: LocZ Is a New Cell Division Protein Involved in Proper Septum Placement in Streptococcus pneumoniae
Source: PubMed Central journal article supplement — mBio. 2014 Dec 30;6(1):e01700-14. doi: 10.1128/mBio.01700-14 (PMC4281919; doi:10.1128/mbio.01700-14), 2014-12-30
Supplement: mbo004142111st2.pdf [file mbo004142111st2.pdf]

**TABLE S2. Bacterial strains and plasmids**

| Strain / plasmid     | Genotype or description                                                                | Source or reference |
|----------------------|----------------------------------------------------------------------------------------|---------------------|
| <b>Strains</b>       |                                                                                        |                     |
| <i>S. pneumoniae</i> |                                                                                        |                     |
| Sp1 (Rx1)            | unencapsulated wild type, <i>strI</i> ; <i>hexA</i>                                    | (1)                 |
| Sp4 (D39)            | encapsulated wild type, serotype 2                                                     | (2)                 |
| Sp57                 | Rx1, $\Delta locZ::lox72$                                                              | This work           |
| Sp58                 | Rx1, <i>cm</i> , $\Delta stkP::cm$ , <i>bgaA::P<sub>czcD</sub>-gfp-locZ</i>            | This work           |
| Sp60                 | Rx1, $\Delta locZ::lox72$ , <i>bgaA::P<sub>czcD</sub>-his-locZ</i>                     | This work           |
| Sp208 (R6)           | unencapsulated wild type                                                               | (3)                 |
| Sp225                | R6, <i>str</i> , <i>rpsL</i>                                                           | This work           |
| Sp227                | R6, <i>str</i> , <i>locZ::janus cassette</i>                                           | This work           |
| Sp228                | R6, <i>str</i> , <i>rfp-locZ</i>                                                       | This work           |
| Sp229                | R6, <i>str</i> , <i>gfp-locZ</i>                                                       | This work           |
| Sp234                | R6, <i>str</i> , <i>locZ-T67A/T78A</i>                                                 | This work           |
| Sp235                | R6, <i>str</i> , <i>locZ-T67E/T78E</i>                                                 | This work           |
| Sp239                | R6, <i>str</i> , $\Delta locZ$                                                         | This work           |
| Sp240                | R6, <i>str</i> , <i>tet</i> , pBCSMH036                                                | This work           |
| Sp242                | R6, <i>str</i> , <i>tet</i> , <i>rfp-locZ</i> , pBCSMH036                              | This work           |
| Sp243                | R6, <i>str</i> , <i>tet</i> , $\Delta locZ$ , pBCSMH036                                | This work           |
| Sp246                | R6, <i>str</i> , <i>tet</i> , <i>bgaA::P<sub>czcD</sub>-gfp-stkP</i>                   | This work           |
| Sp248                | R6, <i>str</i> , <i>tet</i> , <i>rfp-locZ</i> , <i>bgaA::P<sub>czcD</sub>-gfp-stkP</i> | This work           |
| Sp249                | R6, <i>str</i> , <i>tet</i> , $\Delta locZ$ , <i>bgaA::P<sub>czcD</sub>-gfp-stkP</i>   | This work           |

|       |                                                                 |           |
|-------|-----------------------------------------------------------------|-----------|
| Sp250 | R6, <i>str, tet, bgaA:: P<sub>czcD</sub>-divIVA-gfp</i>         | This work |
| Sp253 | R6, <i>str, tet, ΔlocZ, bgaA:: P<sub>czcD</sub>-divIVA-gfp</i>  | This work |
| Sp254 | R6, <i>str, tet, bgaA:: P<sub>czcD</sub>-gfp-ftsA</i>           | This work |
| Sp256 | R6, <i>str, tet, rfp-locZ, bgaA:: P<sub>czcD</sub>-gfp-ftsA</i> | This work |
| Sp257 | R6, <i>str, ΔlocZ, bgaA:: P<sub>czcD</sub>-gfp-ftsA</i>         | This work |
| Sp267 | D39, <i>ΔlocZ::lox72</i>                                        | This work |

---

***E. coli***

|                |                                                                                                           |            |
|----------------|-----------------------------------------------------------------------------------------------------------|------------|
| DH5α           | <i>F- Φ80lacZΔM15 Δ(lacZYA-argF) U169 recA1 endA1 hsdR17 (rk-, mk+) phoA supE44 λ- thi-1 gyrA96 relA1</i> | Invitrogen |
| BL21 (DE3)Star | <i>F- ompT hsdSB(rB-, mB-) gal dcm rne131 (DE3)</i>                                                       | Invitrogen |

---

**Plasmids**

|                         |                                                             |            |
|-------------------------|-------------------------------------------------------------|------------|
| pJWV25                  | <i>Amp, tet, bgaA, P<sub>czcD</sub>-gfp<sup>+</sup></i>     | (4)        |
| pJWV25-GFP-StkP         | <i>Amp, tet, bgaA, P<sub>czcD</sub>-gfp-stkP</i>            | (5)        |
| pJWV25-GFP-FtsA         | <i>Amp, tet, bgaA, P<sub>czcD</sub>-gfp-ftsA</i>            | (5)        |
| pJWV25-DivIVA-GFP       | <i>Amp, tet, bgaA, P<sub>czcD</sub>-divIVA-gfp</i>          | (5)        |
| pZn-GFP-LocZ            | <i>Amp, tet, bgaA, P<sub>czcD</sub>-gfp-locZ</i>            | This study |
| pZn-His6-LocZ           | <i>Amp, tet, bgaA, P<sub>czcD</sub>-his6-locZ</i>           | This study |
| pZn-His6-LocZ-T67A/T78A | <i>Amp, tet, bgaA, P<sub>czcD</sub>-his6-locZ-T67A/T78A</i> | This study |
| pZn-His6-LocZ-T67E/T78E | <i>Amp, tet, bgaA, P<sub>czcD</sub>-his6-locZ-T67E/T78E</i> | This study |

---

|                            |                                                  |            |
|----------------------------|--------------------------------------------------|------------|
| pBCSMH036                  | <i>Tet, P<sub>sigA</sub>- icfp-ftsZ</i>          | (6)        |
| pDELstkP                   | <i>Amp, kan, ΔstkP::cm</i>                       | (7)        |
| pETPHos                    | <i>Amp, pET derivative</i>                       | (8)        |
| pETPHos-LocZ               | <i>Amp, pETPHos, his6-locZ</i>                   | (9)        |
| pETPHos-LocZ-T67A          | <i>Amp, pETPHos, his6-locZ-T67A</i>              | This study |
| pETPHos-LocZ-T78A          | <i>Amp, pETPHos, his6-locZ-T78A</i>              | This study |
| pETPHosLocZ-T67A/T78A      | <i>Amp, pETPHos, his6-locZ-T67A/T78A</i>         | This study |
| pETPHosLocZ-T67A/T78A/S80A | <i>Amp, pETPHos, his6-locZ-T67A/T78A/S80A</i>    | This study |
| pCDFDuet                   | <i>Sm</i>                                        | Novagen    |
| pCDFDuet_locZ/stkP         | <i>Sm, his6-locZ, stkP-kinase domain</i>         | This study |
| Cheshire cassette          | <i>Erm, loxP/ermAM/P<sub>fcsk</sub>/cre/loxP</i> | (10)       |
| Janus cassette             | <i>Kan, kan-rpsL<sup>+</sup></i>                 | (11)       |

Amp: ampicillin resistance marker; Cm: chloramphenicol resistance marker; Kan: kanamycin resistance marker; Tet: tetracycline resistance marker, Erm: erythromycin resistance marker; Str: streptomycin resistance marker; Sm: spectinomycin resistance marker

## References

1. Morrison, D. A., M. C. Trombe, M. K. Hayden, G. A. Waszak, and J. D. Chen. 1984. Isolation of transformation-deficient *Streptococcus pneumoniae* mutants

- defective in control of competence, using insertion-duplication mutagenesis with the erythromycin resistance determinant of pAM beta 1. *J.Bacteriol.* **159**:870-876.
2. **Avery, O. T., C. M. Macleod, and M. McCarty.** 1944. Studies on the chemical nature of the substance inducing transformation of pneumococcal types : induction of transformation by a desoxyribonucleic acid fraction isolated from pneumococcus type III. *J.Exp.Med.* **79**:137-158.
  3. **Hoskins, J., W. E. Alborn, Jr., J. Arnold, L. C. Blaszcak, S. Burgett, B. S. DeHoff, S. T. Estrem, L. Fritz, D. J. Fu, W. Fuller, C. Geringer, R. Gilmour, J. S. Glass, H. Khoja, A. R. Kraft, R. E. Lagace, D. J. LeBlanc, L. N. Lee, E. J. Lefkowitz, J. Lu, P. Matsushima, S. M. McAhren, M. McHenney, K. McLeaster, C. W. Mundy, T. I. Nicas, F. H. Norris, M. O'Gara, R. B. Peery, G. T. Robertson, P. Rockey, P. M. Sun, M. E. Winkler, Y. Yang, M. Young-Bellido, G. Zhao, C. A. Zook, R. H. Baltz, S. R. Jaskunas, P. R. Rosteck, Jr., P. L. Skatrud, and J. I. Glass.** 2001. Genome of the bacterium *Streptococcus pneumoniae* strain R6. *J.Bacteriol.* **183**:5709-5717.
  4. **Eberhardt, A., L. J. Wu, J. Errington, W. Vollmer, and J. W. Veening.** 2009. Cellular localization of choline-utilization proteins in *Streptococcus pneumoniae* using novel fluorescent reporter systems. *Mol.Microbiol.* **74**:395-408.
  5. **Beilharz, K., L. Novakova, D. Fadda, P. Branny, O. Massidda, and J. W. Veening.** 2012. Control of cell division in *Streptococcus pneumoniae* by the conserved Ser/Thr protein kinase StkP. *Proc.Natl.Acad.Sci.U.S.A.*

6. **Henriques, M. X., M. J. Catalao, J. Figueiredo, J. P. Gomes, and S. R. Filipe.** 2013. Construction of improved tools for protein localization studies in *Streptococcus pneumoniae*. PLoS.One. **8**:e55049.
7. **Novakova, L., L. Saskova, P. Pallova, J. Janecek, J. Novotna, A. Ulrych, J. Echenique, M. C. Trombe, and P. Branny.** 2005. Characterization of a eukaryotic type serine/threonine protein kinase and protein phosphatase of *Streptococcus pneumoniae* and identification of kinase substrates. FEBS J. **272**:1243-1254.
8. **Canova, M. J., L. Kremer, and V. Molle.** 2008. pETPhos: a customized expression vector designed for further characterization of Ser/Thr/Tyr protein kinases and their substrates. Plasmid **60**:149-153.
9. **Novakova, L., S. Bezouskova, P. Pompach, P. Spidlova, L. Saskova, J. Weiser, and P. Branny.** 2010. Identification of multiple substrates of the StkP Ser/Thr protein kinase in *Streptococcus pneumoniae*. J.Bacteriol. **192**:3629-3638.
10. **Weng, L., I. Biswas, and D. A. Morrison.** 2009. A self-deleting *Cre-lox-ermAM* cassette, Cheshire, for marker-less gene deletion in *Streptococcus pneumoniae*. J.Microbiol.Methods **79**:353-357.
11. **Sung, C. K., H. Li, J. P. Claverys, and D. A. Morrison.** 2001. An *rpsL* cassette, janus, for gene replacement through negative selection in *Streptococcus pneumoniae*. Appl.Environ.Microbiol. **67**:5190-5196.
